# Supplementary material
Source: publisher site journal article supplement (https://www.dovepress.com/article/339670)
Supplement: Supplementary file 1 [file get_supplementary_file.php]

**Supplementary materials**

**
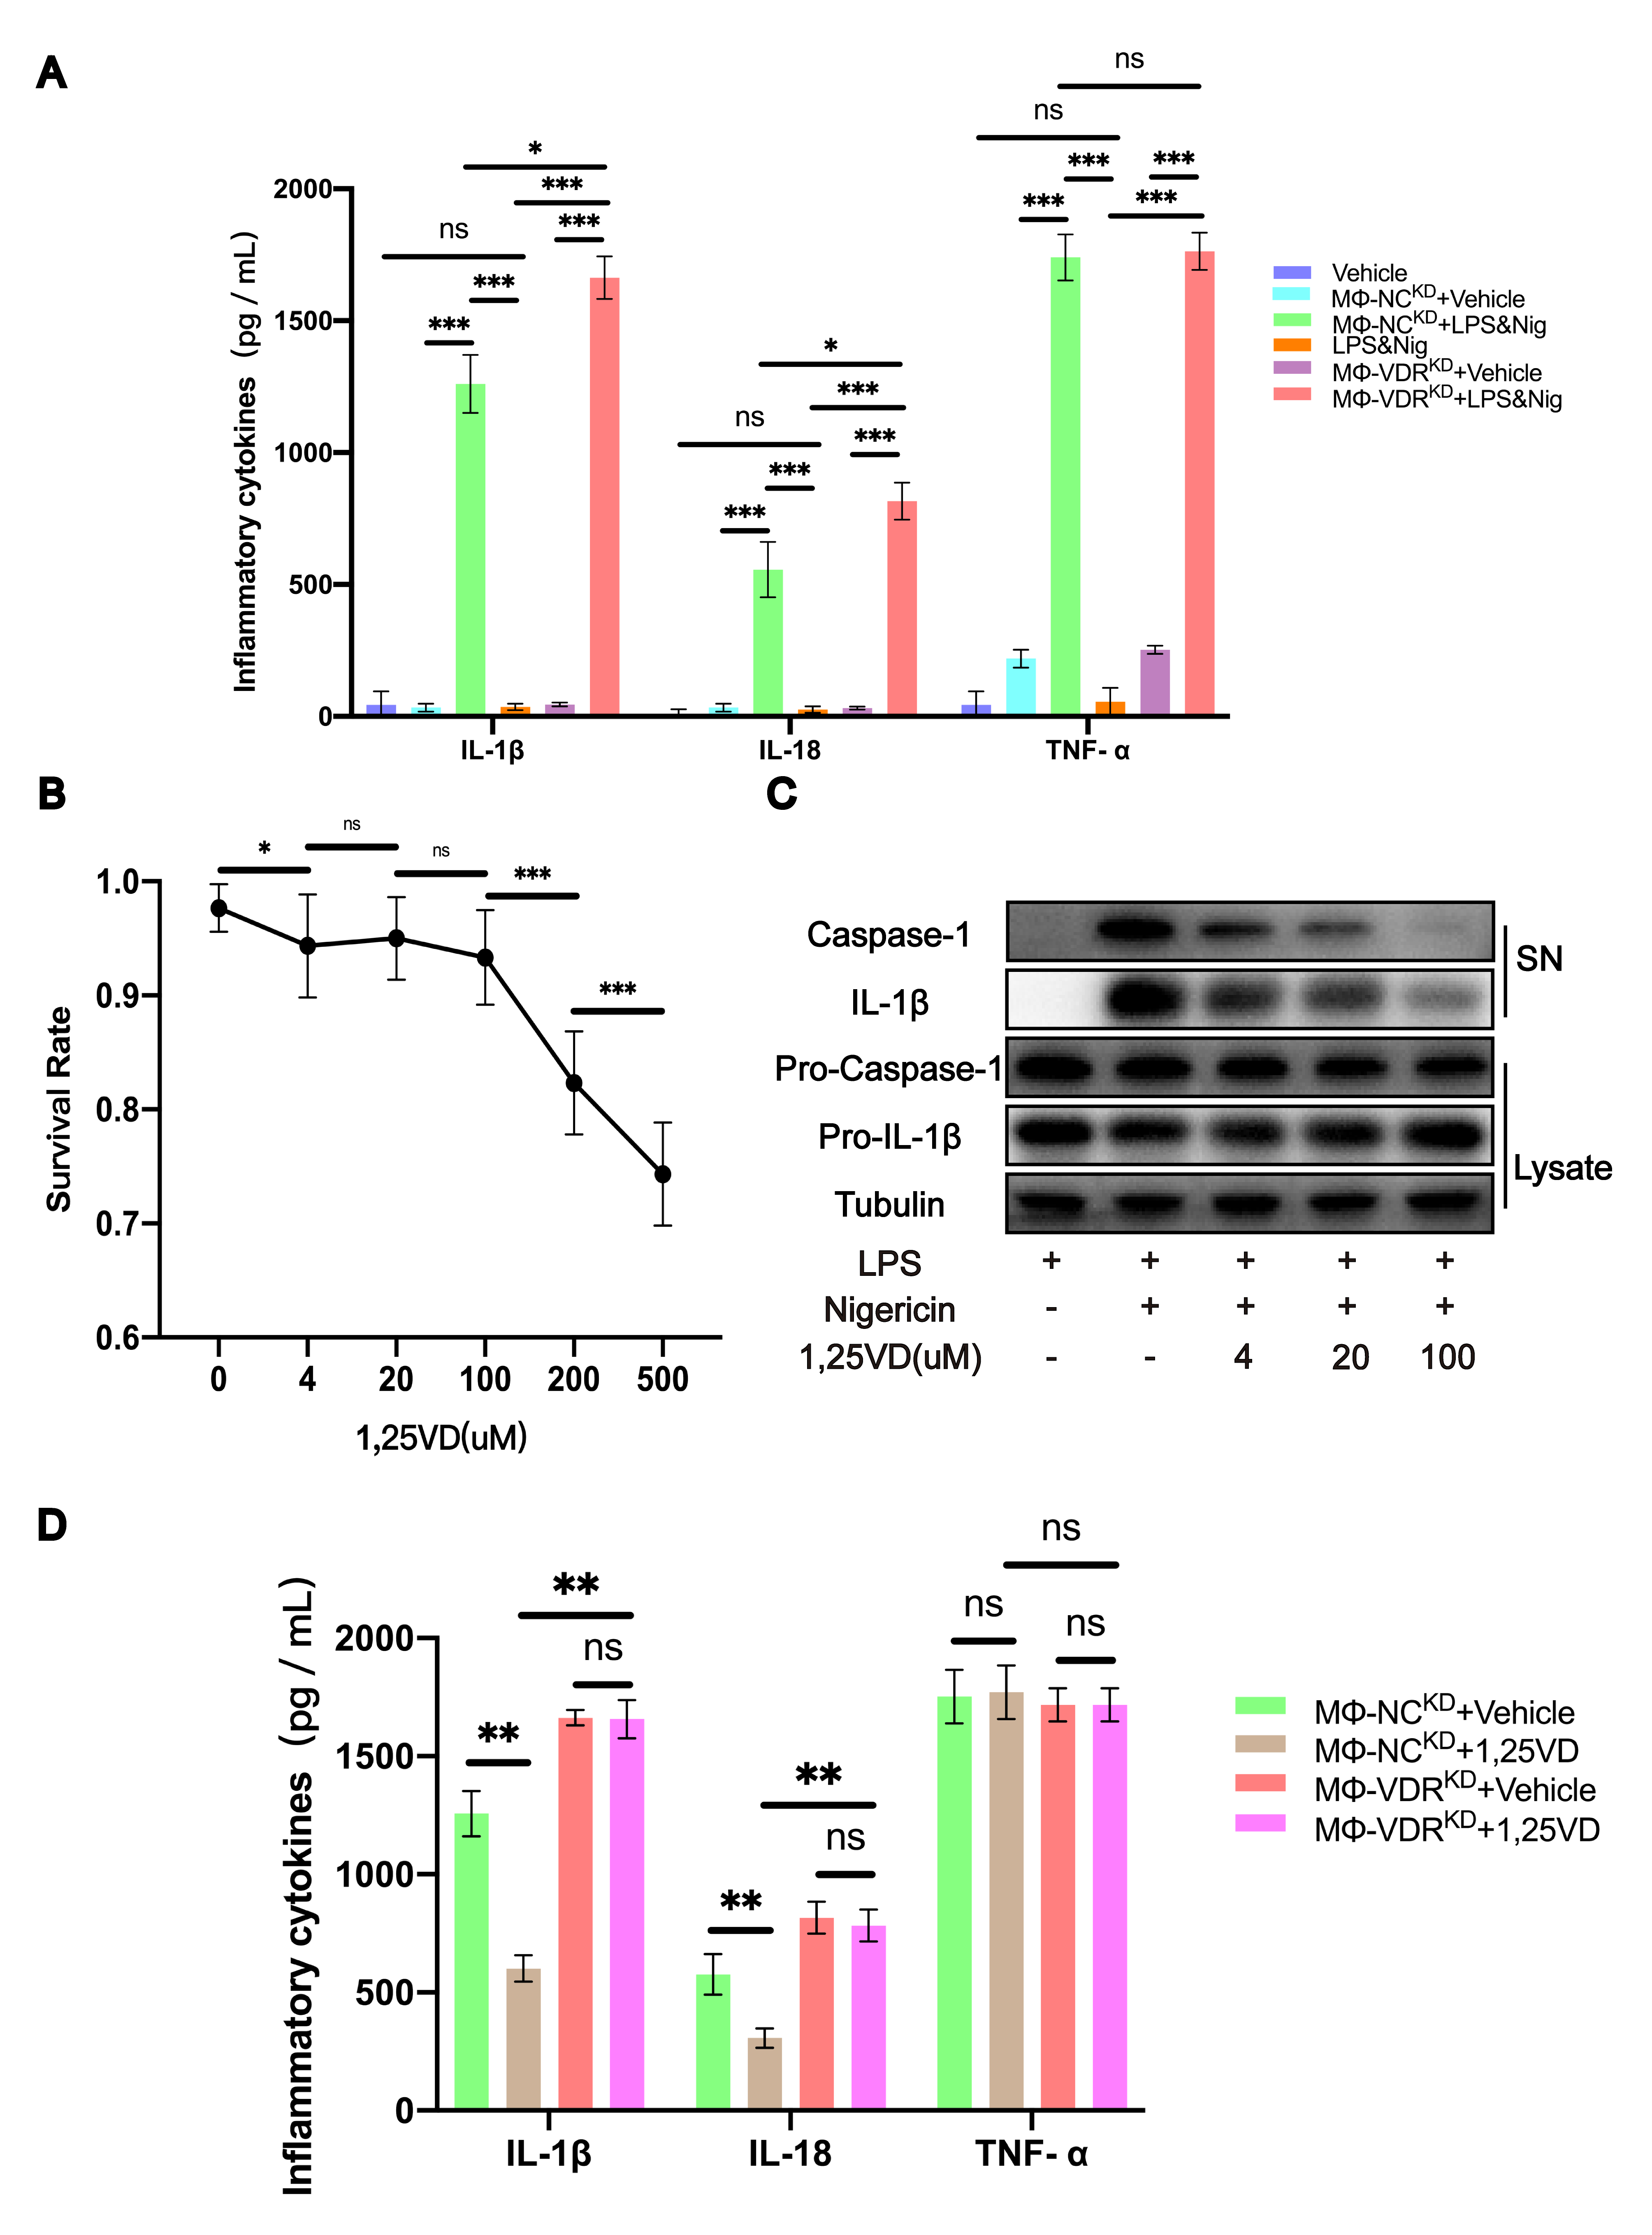
**

**Supplementary Figure 1 | Secretion of inflammatory factors in each group and cytotoxicity assay of 1,25VD. A.** The levels of IL-1β, IL-18 and TNF-α in the supernatant of each group (n = 3, one-way ANOVA). **B.** A cytotoxicity assay of 1,25VD (n = 3, one-way ANOVA). **C.** Analysis of 1,25VD dose effect experiment. **D.** The levels of IL-1β, IL-18 and TNF-α in the supernatant of each group (n = 3, one-way ANOVA). Data are presented as mean ± SD. ns,no significance; *P < 0.05 ;**P < 0.01; ***P < 0.001.
